# Supplementary material for: Flame retardants in dust from the indoor environments of expedition cruise ships
Source: Royal Society of Chemistry journal article supplement (doi:10.1039/d5va00257e), 2025-12-04
Supplement: d5va00257e1.pdf [file d5va00257e1.pdf]

Supplementary Information

for

**Flame retardants in dust from the indoor environments of expedition  
cruise ships**

Veronica van der Schyff<sup>1\*</sup>, Verena Meraldi<sup>2</sup>, Andrew Luke King<sup>3</sup>, Simona Rozárka Jílková<sup>1</sup>, Ondřej  
Audy<sup>1</sup>, Petr Kukučka<sup>1</sup>, Jiří Kohoutek<sup>1</sup>, Lisa Melymuk<sup>1</sup>

\* Corresponding author: Veronica van der Schyff

<sup>1</sup>RECETOX, Faculty of Science, Masaryk University, Kotlarska 2, 61137 Brno, Czech Republic

<sup>2</sup> HX (formerly Hurtigruten Expeditions), N1 9JY, London, U.K.

<sup>3</sup>Norwegian Institute for Water Research (NIVA), Økernveien 94, 0579, Oslo, Norway

*Contains 4 texts, 11 tables, 10 figure. 2 tables in seperate excel files.*

## Contents

|                                                                     |     |
|---------------------------------------------------------------------|-----|
| Text S1: Detailed location selection and sampling limitations ..... | S5  |
| Text S2: Homogenization and extraction .....                        | S8  |
| Text S3: Instrumental analyses .....                                | S11 |
| Text S4: Quality assurance/ Quality control.....                    | S18 |
| References.....                                                     | S23 |

*List of Tables and Figures*

|                                                                                                                                                                              |                    |
|------------------------------------------------------------------------------------------------------------------------------------------------------------------------------|--------------------|
| <b>Table S1.</b> Full list of target analytes with identifiers and *MDL/LOQ concentrations (ng/g)                                                                            | S4                 |
| <b>Table S2.</b> Sampling locations on different ships and analyses conducted (#Methanol extraction: OPEs; *SUPRA: PBDE & AHFRs)                                             | S6                 |
| Figure S1A-H: Examples of different locations present on all sampled ships                                                                                                   | S7                 |
| <b>Figure S2.</b> Photographs of specialized dust sampling vacuum head (photo credit: Paula Marcineková)                                                                     | S8                 |
| <b>Table S3:</b> Internal Standards for compounds used in GC/MS analysis. Spiked volumes for all standards were 50 µl                                                        | S10                |
| <b>Table S4.</b> Internal Standards for compounds used in LC/MS analysis. Spiked volumes for all standards were 50 µl                                                        | S11                |
| <b>Table S5.</b> Ion source parameters of LC/MS analyses                                                                                                                     | S11                |
| <b>Table S6.</b> Mass spectrometric parameters for OPE analyses (LC/MS)                                                                                                      | S12                |
| <b>Figure S3.</b> Chromatographic separation of OPE - analytical standards mixture at 10ppb, column Waters Acquity UPLC BEH C18 100x2,1mm                                    | S13                |
| <b>Figure S4.</b> Chromatographic separation of OPE - blank sample, column Waters Acquity UPLC BEH C18 100x2,1mm                                                             | S13                |
| <b>Figure S5.</b> Chromatographic separation of OPE - dust sample (NIST® SRM® 2585), TBOEP (tR=7.9 min) intensity 8x104 counts, column Waters Acquity UPLC BEH C18 100x2,1mm | S13                |
| <b>Table S7.</b> Mass spectrometric parameters for PBDE analyses (GC/MS)                                                                                                     | S15                |
| <b>Figure S6.</b> Example Chromatograph of BDE-209 standard                                                                                                                  | S16                |
| <b>Table S8.</b> Mass spectrometric parameters for AHFR analyses (GC/MS)                                                                                                     | S17                |
| <b>Figure S7.</b> Example chromatograph of BEH-TEBP analyes                                                                                                                  | S18                |
| <b>Table S9.</b> Recovery rates (%) of deuterated OPE internal standards                                                                                                     | S19                |
| <b>Table S10.</b> Recovery rates (%) of isotopically labeled PBDE internal standards                                                                                         | S19                |
| <b>Table S11.</b> Recovery rates (%) of isotopically labeled AHFR standards                                                                                                  | S19                |
| <b>Table S12: Full list of measured concentrations</b>                                                                                                                       | See<br>excell file |
| <b>Figure S8.</b> Flame retardant concentrations in different locations across the three sampled ships; excluding TCIPP                                                      | S21                |
| <b>Figure S9.</b> Relative compositions of major flame retardants in different areas of three expedition ships excluding TCIPP                                               | S22                |
| <b>Figure S10.</b> Median OPE concentrations across different ships, excluding TCIPP                                                                                         | S23                |
| <b>Table S13: Estimated FR exposures via dust</b>                                                                                                                            | See                |

**excell file**

Table S1. Full list of target analytes with identifiers and \*MDL/LOQ concentrations (ng/g)

|       | CHEMICAL ABBREVIATION | CHEMICAL_NAME                                    | CAS         | INCHIKEY                     | MDL/LOQ*  |
|-------|-----------------------|--------------------------------------------------|-------------|------------------------------|-----------|
| PBDEs | PBDE28                | 2,4,4'-Tribromodiphenyl ether                    | 41318-75-6  | UPNBTHXPIWQX-UHFFFAOYSA-N    | 0.0146    |
|       | PBDE47                | 2,2',4,4'-Tetrabromodiphenyl ether               | 5436-43-1   | XYBSIMGXVUVGY-UHFFFAOYSA-N   | 0.0110    |
|       | PBDE66                | 2,3',4,4'-Tetrabromodiphenyl ether               | 189084-61-5 | DHUMTYRHKMCVAG-UHFFFAOYSA-N  | 0.0168    |
|       | PBDE100               | 2,2',4,4',6-Pentabromodiphenyl ether             | 189084-64-8 | NSKIRYMHNFTLR-UHFFFAOYSA-N   | 0.0193    |
|       | PBDE99                | 2,2',4,4',5-Pentabromodiphenyl ether             | 60348-60-9  | WHPVYXDFIXRKLN-UHFFFAOYSA-N  | 0.0280    |
|       | PBDE85                | 2,2',3,4,4'-Pentabromodiphenyl ether             | 182346-21-0 | DMLQSUZPTTUUDP-UHFFFAOYSA-N  | 0.0311    |
|       | PBDE154               | 2,2',4,4',5,6'-Hexabromodiphenyl ether           | 207122-15-4 | VHNPZYQKWVOD-UHFFFAOYSA-N    | 0.0363    |
|       | PBDE153               | 2,2',4,4',5,5'-Hexabromodiphenyl ether           | 68631-49-2  | RZXIRSKYBISPGF-UHFFFAOYSA-N  | 0.0482    |
|       | PBDE183               | 2,2',3,4,4',5',6-Heptabromodiphenyl ether        | 207122-16-5 | ILPSCQCLBHQEM-UHFFFAOYSA-N   | 0.0822    |
|       | PBDE209               | 2,2',3,3',4,4',5,5',6,6'-Decabromodiphenyl ether | 1163-19-5   | WHHGLZMJPXIBX-UHFFFAOYSA-N   | 1.047     |
| AHFRs | PBBZ                  | 1,2,3,4,5-Pentabromobenzene                      | 608-90-2    | LLVVSBBXENOOQY-UHFFFAOYSA-N  | 0.021948  |
|       | PBT                   | 2,3,4,5,6-Pentabromotoluene                      | 87-83-2     | OZHJEQVYCBTHJT-UHFFFAOYSA-N  | 0.0474795 |
|       | PBEB                  | 2,3,4,5,6-Pentabromoethylbenzene                 | 85-22-3     | FIAXCDIQXHJNIX-UHFFFAOYSA-N  | 0.0586975 |
|       | TBP-DBPE              | 1,3,5-Tribromo-2-(2,3-dibromopropoxy)benzene     | 35109-60-5  | QXWYPAKUEHGJSG-UHFFFAOYSA-N  | 0.0027991 |
|       | HBB                   | Hexabromobenzene                                 | 87-82-1     | CAYGQBVSZOZLICD-UHFFFAOYSA-N | 0.0396235 |
|       | PBBA                  | (Pentabromophenyl)methyl acrylate                | 59447-55-1  | GRKDVZMVHOLESV-UHFFFAOYSA-N  | 0.0003891 |
|       | EH-TBB                | 2-Ethylhexyl 2,3,4,5-tetrabromobenzoate          | 183658-27-7 | HVDXCGSGEQKWGB-UHFFFAOYSA-N  | 0.188582  |
|       | TDBP-TAZTO            | 1,3,5-Tris(2,3-dibromopropyl) isocyanurate       | 52434-90-9  | NZUPFZNVGSQLQC-UHFFFAOYSA-N  | 0.0008953 |
|       | BEH-TEBP              | Bis(2-ethylhexyl) tetrabromophthalate            | 26040-51-7  | UUEDINPOVKWVAZ-UHFFFAOYSA-N  | 0.2438225 |
|       | TBCT                  | 2,3,4,5-tetrabromo-6-chloromethylbenzene         | 39569-21-6  | WMXWTOJJASZOCL-UHFFFAOYSA-N  | 0.0002754 |
|       | DBDPE                 | Decabromodiphenyl ethane                         | 84852-53-9  | BZQKBFEHWDPOHD-UHFFFAOYSA-N  | 0.00296   |
|       | aDBE-DBCH             | 1,2-Dibromo-4-(1,2-dibromoethyl)cyclohexane      | 3322-93-8   | PQRRSJBLKOPVJV-OSMVPFSASA-N  | 0.0000739 |
|       | bDBE-DBCH             |                                                  |             | PQRRSJBLKOPVJV-LXGUWJNJSAN   | 0.0000746 |
|       | gdBE-DBCH             |                                                  |             |                              | 0.0002719 |
|       | TBX                   | 2,3,5,6-Tetrabromo-p-xylene                      | 23488-38-2  | RXKOKVQKECYOT-UHFFFAOYSA-N   | 0.0002786 |
|       | TBP-AE                | 1,3,5-Tribromo-2-(prop-2-en-1-yloxy)benzene      | 3278-89-5   | RZLLIOPGUFOWOD-UHFFFAOYSA-N  | 0.0002165 |
|       | BATE                  | 2-Bromoallyl 2,4,6-tribromophenyl ether          | 99717-56-3  | RLPZXGWCSHFJKJ-UHFFFAOYSA-N  | 0.0002078 |
|       | bTBCO                 | 1,2,5,6-Tetrabromocyclooctane                    | 3194-57-8   | RZLXIANUDLLFHN-UHFFFAOYSA-N  | 0.0001963 |
|       | aTBCO                 |                                                  |             |                              | 0.0005239 |
|       | DBHCTD                | Hexachlorocyclopentadienyl-dibromocyclooctane    | 51936-55-1  | XRFONNJUMOCNHA-UHFFFAOYSA-N  | 0.0002246 |
|       | BTBPE                 | 1,2-Bis(2,4,6-tribromophenoxy)ethane             | 37853-59-1  | YATIGPZCMOYEGE-UHFFFAOYSA-N  | 0.461     |
|       | sDP                   | syn-Dechlorane Plus                              | 135821-03-3 | UGQQAJOWXNCOPY-MXYLTYESNA-N  | 0.307     |
|       | aDP                   | anti-Dechlorane Plus                             | 135821-74-8 | UGQQAJOWXNCOPY-VBCJEVMVNA-N  | 0.719     |
| OPEs  | TCEP                  | Tris(2-chloroethyl) phosphate                    | 115-96-8    | HQUQLFOMPYWACS-UHFFFAOYSA-N  | 7.23      |
|       | TCIPP                 | Tris(2-chloroisopropyl)phosphate                 | 13674-84-5  | KVMPUXDNESXNOH-UHFFFAOYSA-N  | 49.3      |
|       | TDCIPP                | Tris(1,3-dichloro-2-propyl) phosphate            | 13674-87-8  | ASLWPAWFJZFCF-UHFFFAOYSA-N   | 1.98      |
|       | TBOEP                 | Tris(2-butoxyethyl) phosphate                    | 78-51-3     | WTLBZVNBKMDVP-UHFFFAOYSA-N   | 0.638     |
|       | TPhP                  | Triphenyl phosphate                              | 115-86-6    | XZZNDPSIHUTMOC-UHFFFAOYSA-N  | 5.34      |
|       | TEHP                  | Tris(2-ethylhexyl) phosphate                     | 78-42-2     | GTVWRXDRKAHEAD-UHFFFAOYSA-N  | 2.11      |
|       | CDP                   | Cresyl diphenyl phosphate                        | 26444-49-5  | XMNDMAQKWSQVOV-UHFFFAOYSA-N  | 0.356     |
|       | EHDPP                 | 2-Ethylhexyl diphenyl phosphate                  | 1241-94-7   | CGSLYBDCEGBZCG-UHFFFAOYSA-N  | 10.3      |
|       | TDBPP                 | Tris(2,3-dibromopropyl) phosphate                | 126-72-7    | PQYJRMFWJJONBO-UHFFFAOYSA-N  | 0.43      |
|       | TnPP                  | Tripropyl phosphate                              | 513-08-6    | RXPQRKFMDQNODS-UHFFFAOYSA-N  | 0.01      |
|       | ip-TTP                | Triphenyl phosphates isopropylated               | 68937-41-7  | No INCHIKEY                  | 0.0119    |
|       | TEP                   | Triethyl phosphate                               | 78-40-0     | DQWPFSLDHJDLRL-UHFFFAOYSA-N  | 22.73     |
|       | oTMPP                 | Tri-o-cresyl phosphate                           | 78-30-8     | YSMRWXYRBRSDND-UHFFFAOYSA-N  | 0.035     |
|       | m/p TMPP              | Tris(methylphenyl) phosphate                     | 1330-78-5   | No INCHIKEY                  | 0.0146    |
|       | TiBP                  | Triisobutyl phosphate                            | 126-71-6    | HRKAMJBPFPHCSN-UHFFFAOYSA-N  | 2.54      |
|       | TnBP                  | Tributyl phosphate                               | 126-73-8    | STCOOQWBFONSKY-UHFFFAOYSA-N  | 0.01      |

\*Colour code: Green: No concentrations in blank values. LOQ's were determined. Median of LOQ values reported  
Blue: No concentrations in blank values. Instrumental LOQs used  
Yellow: MDL calculated as average + 3\*SD of blank values

## **Text S1: Detailed location selection and sampling limitations**

We attempted to collect dust from representative and comparable areas on board all ships, with a balance of crew and passenger areas.

While the layouts of the ships were similar, they were not identical, and some adjustments had to be made (for instance, the shop and reception on Ship 3 occupied the same space and were sampled together, while they were distinctly different in other ships). Figures S1A-H indicate examples of different public areas (and crew cabin) present on all ships. No photographs of technical spaces were allowed.

Because of strict cleaning routines, it was difficult to obtain sufficient amounts of dust from every area. Especially during the first sampling campaign (Ship 2), not enough dust was collected in every location. This was rectified in the other campaigns (except the crew mess in Ship 3). In the instances of low dust mass collected, dust was prioritized for methanol extractions.

*Table S2: Sampling locations on different ships and analyses conducted (#Methanol extraction: OPEs; \*SUPRA: PBDE & AHFRs)*

| Ship 1              | #<br>M | *<br>S | Ship 2          | #<br>M | *<br>S | Ship 3             | #M | *S |
|---------------------|--------|--------|-----------------|--------|--------|--------------------|----|----|
| Restaurant 1        | X      | X      | Restaurant 1    | X      | X      | Restaurant 1       | x  | X  |
| Restaurant 2        | X      | X      | Restaurant 2    | X      | X      | Restaurant 2       | X  | X  |
| Restaurant 3        | X      | X      | Restaurant 3    | X      | X      | Restaurant 3       | X  | X  |
| Science center      | X      | X      | Science center  | X      | X      | Science center     | X  | X  |
| Lounge              | X      | X      | Lounge          | X      |        | Lounge             | X  | X  |
| Passenger cabin     | X      | X      | Passenger cabin | X      | X      | Passenger cabin    | X  | X  |
| Crew cabin          | X      | X      | Crew cabin      | X      | X      | Crew cabin         | X  | X  |
| Crew mess/day room  | X      | X      | Crew mess       | X      | X      | Crew mess          | X  |    |
| Shop                | X      | X      | Shop            | X      |        | Crew day room      | X  | X  |
| Reception           | X      | X      | Reception       | X      |        | Shop and reception | X  | X  |
| Hallway             | X      | X      | Hallway         | X      | X      | Hallway            | X  | X  |
| Lecture hall        | X      | X      | Crew corridor   | X      |        | Lecture hall       | X  | X  |
| Bridge              | X      | X      |                 |        |        | Bridge             | X  | X  |
| Laundry             | X      | X      |                 |        |        |                    |    |    |
| Engine control room | X      | X      |                 |        |        |                    |    |    |
| Engine room         | X      | X      |                 |        |        |                    |    |    |

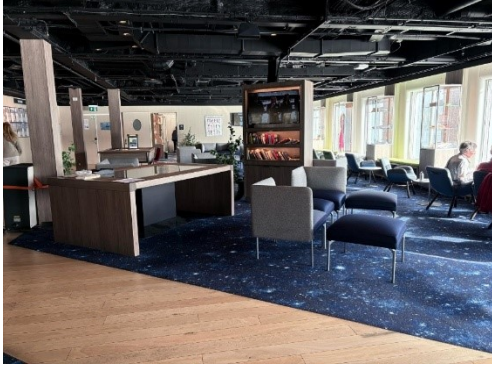

Figure S1A: Science center

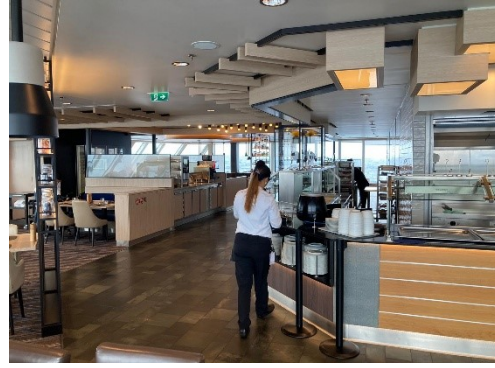

Figure S1B: Restaurant 1

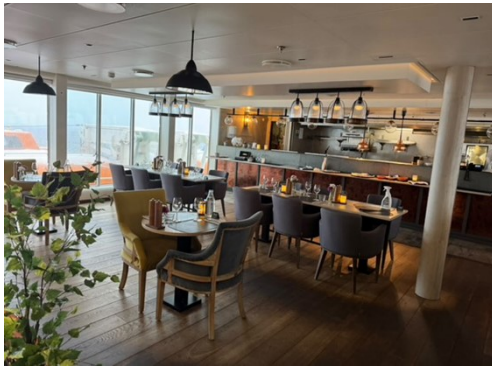

Figure S1C: Restaurant 2

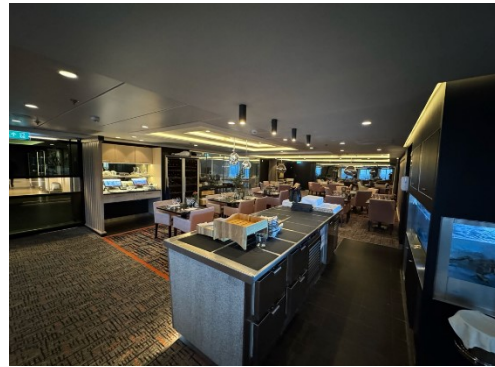

Figure S1D: Restaurant 3

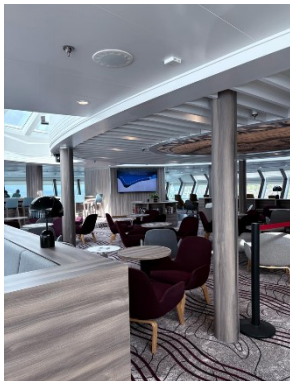

Figure S1E: Lounge

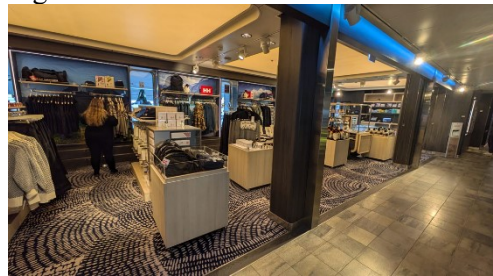

Figure S1F: Shop

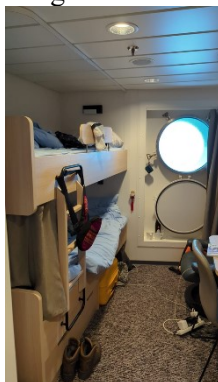

Figure S1G: Crew cabin

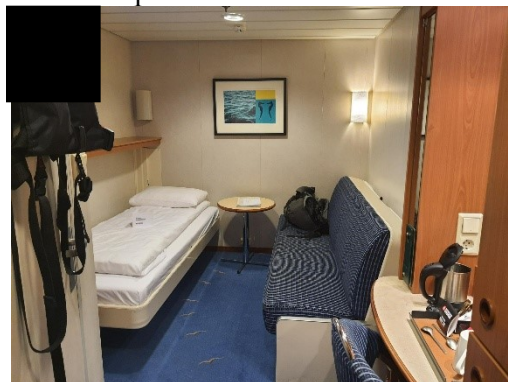

Figure S1H: Passenger cabin

*Figure S1A-H: Examples of different locations present on all sampled ships*



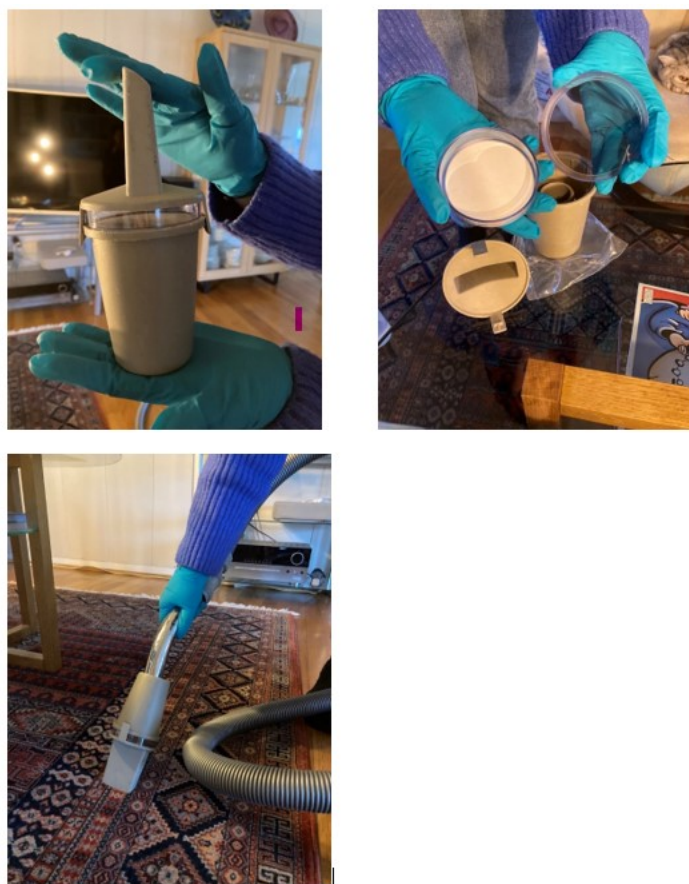

Figure S2: Photographs of specialized dust sampling vacuum head (photo credit: Paula Marcineková)

## Text S2: Homogenization and extraction

Dust samples were homogenized using a Retsch MM 301 mixer mill (Retsch GmbH, Germany) equipped with tungsten carbide grinding jars and a wolframite weight. Prior to homogenization, the grinding jars containing dust samples and quartz filters, were cooled in liquid nitrogen for two minutes to embrittle the dust matrix. This step enhanced mechanical pulverization and prevented the material from agglomerating into compacted masses during milling. The samples were ground for 30 seconds at  $25 \text{ s}^{-1}$ . The resulting homogenized samples were transferred to pre-weighed, baked glass vials and stored at  $-20^\circ\text{C}$  until analysis.

Polybrominated diphenyl ethers (PBDEs) and alternative halogenated flame retardants (AHFRs) were extracted using supramolecular solvent extraction (SUPRAS), following the method



described by Marcinekova et al.<sup>1</sup> Organophosphate esters (OPEs) were extracted using a methanol-based extraction protocol adjusted from Svobodová et al.<sup>2</sup>

Dust from Ship 2 was analyzed in summer of 2023 and from Ships 1 and 3 late 2023/ early 2024. Slight differences were made to the extraction protocols – For Ship 2, 10 mg of dust was used to extract OPEs (methanol extraction), but only 1 mg was used to extract from Ships 1 and 3.

## **2.1 SUPRA Extraction**

A SUPRA mixture was made using 3 ml of 1-Hexanol, 6 ml tetrahydrofuran (THF), and 21 ml Milli-Q ultrapure water. The mixture was shaken well by hand before being centrifuged for 30 minutes at 2400 rpm (1250 G). The upper layer (SUPRA layer) was transferred to a 15 ml centrifuge tube, and the equilibrium solution was kept in the main glass container. For extraction, 100 mg of homogenized dust was spiked with 50 µL of recovery standard consisting of isotopic labelled PBDEs and AHFRs (Table S2). The solvent was evaporated to dryness under a gentle stream of nitrogen. The dried dust was then reconstituted with 600 µL of SUPRA equilibrium solution to ensure full wetting, followed by an additional 400 µL of the SUPRA solution. Samples were sonicated at room temperature for 20 minutes, then centrifuged at 11,000 rpm (5411G) for 15 minutes. The resulting supernatants were transferred into clean GC/LC vials and evaporated to dryness under nitrogen. 50 µL of nonane was added. Prior to instrumental analysis, each extract was spiked with 50 µL of recovery standards (0.2 mg/mL <sup>13</sup>C-labelled PCB-95 and 4 µg/mL p-terphenyl) and with 10 µL of 100 ng/mL BDE-77 and BDE-138 as syringe standards. The recovery standards were used to monitor and account for extraction efficiency, while the syringe standards were used to verify injection consistency and the accuracy of the instrumental analysis

## 2.2 Methanol extraction

To analyze OPEs, 10 mg (for Ship 2) and 1 mg (Ships 1 and 3) of dust was spiked with 50  $\mu$ l recovery standard (deuterated OPEs; Table S3). 3 ml of methanol was added to each sample, after which it was placed in an ultrasonic bath for 20 minutes and left to settle for a further 20 minutes. The extract was transferred to a new clean vial. The process was repeated twice more (3 times total) until 9 ml of extract was in vials. The volume was reduced to 1 ml under nitrogen flow. The extract was filtered through a syringe filter (Chromafil Xtra PA-45/13; Macherey-Nagel) into a mini vial, after which it was reduced to <0.5 ml under nitrogen flow. Methanol was added to an exact volume of 0.5 ml (determined by weight), followed by 0.5 ml of ultrapure Milli-Q water. All internal standards were procured from Wellington Laboratories, Canada.

Table S3: Internal Standards for compounds used in GC/MS analysis. Spiked volumes for all standards were 50  $\mu$ l.

| Group | Internal Standard | Concentration<br>( $\mu$ g/ml) |
|-------|-------------------|--------------------------------|
| PBDEs | 13C12 PBDE 28     | 0.02                           |
| PBDEs | 13C12 PBDE 47     | 0.02                           |
| PBDEs | 13C12 PBDE 99     | 0.02                           |
| PBDEs | 13C12 PBDE 100    | 0.02                           |
| PBDEs | 13C12 PBDE 153    | 0.02                           |
| PBDEs | 13C12 PBDE 154    | 0.02                           |
| PBDEs | 13C12 PBDE 183    | 0.02                           |
| PBDEs | 13C12 PBDE 209    | 0.1                            |
| AHFRs | 13C6 PBBZ         | 0.02                           |
| AHFRs | 13C6 HBB          | 0.02                           |
| AHFRs | 13C aDP           | 0.02                           |
| AHFRs | 13C sDP           | 0.02                           |
| AHFRs | 13C6 BTBPE        | 0.02                           |
| AHFRs | 13C6 d17-BEH-TEBP | 0.02                           |
| AHFRs | 13C6 d17-EH-TBB   | 0.02                           |
| AHFRs | 13C14 DBDPE       | 0.03                           |

Table S4: Internal Standards for compounds used in LC/MS analysis. Spiked volumes for all standards were 50  $\mu$ l.

| Group | Internal Standard | Concentration |
|-------|-------------------|---------------|
|-------|-------------------|---------------|

|      |                        | ( $\mu\text{g/ml}$ ) |
|------|------------------------|----------------------|
| OPEs | D15 TDCIPP             | 0.2                  |
| OPEs | D27 TNBP               | 0.2                  |
| OPEs | D21 TnPP               | 0.2                  |
| OPEs | $^{13}\text{C}12$ TPHP | 0.2                  |

## Text S3: Instrumental analyses

### S3.1 OPEs

OPEs were quantified using an Agilent 1290 Infinity high performance liquid chromatography (HPLC) (Agilent Technologies, Santa Clara, CA, USA) coupled to an Agilent 6495 triple quadrupole mass spectrometer operating in positive electrospray ionization mode (ESI+). Chromatographic separation was performed on an ACQUITY BEH C18 column (2.1 mm  $\times$  100 mm, 1.7  $\mu\text{m}$ ; Waters Corporation, Milford, MA, USA), maintained at 30  $^{\circ}\text{C}$ . A 3  $\mu\text{L}$  injection volume was used for all samples. The mobile phases consisted of 0.1% formic acid in water (A) and 0.1% formic acid in methanol (B), with a flow rate of 0.2 mL/min. Mass spectrometric detection was conducted under the following source conditions: capillary voltage of 2700 V, source temperature of 400  $^{\circ}\text{C}$ , and nitrogen as the sheath gas. Quantification was performed using isotope dilution with  $^{13}\text{C}$ - or deuterium-labeled standards for TPHP, TnBP, TDCIPP, and TnPP. The method operated in multiple reaction monitoring (MRM) mode, with a linear calibration range of 0.09–90  $\mu\text{g/L}$  and limits of quantification (LOQs) between 0.01 and 0.79  $\mu\text{g/L}$  for individual analytes.

Table S5. Ion source parameters of LC/MS analyses

| Parameter                                     |      |
|-----------------------------------------------|------|
| Drying gas temperature ( $^{\circ}\text{C}$ ) | 290  |
| Drying gas flow (L/min)                       | 11   |
| Nebulizer (psi)                               | 25   |
| SheathGasHeater ( $^{\circ}\text{C}$ )        | 400  |
| SheathGasFlow (L/min)                         | 12   |
| Capillary voltage (V)                         | 2700 |

Table S6. Mass spectrometric parameters for OPE analyses (LC/MS)

| Analyte           | Precursor ion (m/z) | Product ion (m/z) | Fragmentor (V) | Collision energy (V) | Retention time (min) |
|-------------------|---------------------|-------------------|----------------|----------------------|----------------------|
| CDP (Quan)        | 341.1               | 152               | 166            | 40                   | 7.1                  |
| CDP (Qual)        | 341.1               | 91                | 166            | 40                   | 7.1                  |
| EHDPP (Quan)      | 363.17              | 251               | 166            | 13                   | 10.0                 |
| EHDPP (Qual)      | 363.17              | 77.2              | 166            | 50                   | 10.0                 |
| ip-TPP (Quan)     | 453.22              | 411.1             | 166            | 13                   | 12.0                 |
| ip-TPP (Qual)     | 453.22              | 327               | 166            | 29                   | 12.0                 |
| TBOEP (Quan)      | 399.25              | 299.1             | 166            | 9                    | 7.8                  |
| TBOEP (Qual)      | 399.25              | 199.1             | 166            | 9                    | 7.8                  |
| TCEP (Quan)       | 284.96              | 222.9             | 166            | 9                    | 2.3                  |
| TCEP (Qual)       | 284.96              | 63.2              | 166            | 41                   | 2.3                  |
| TCIPP (Quan)      | 329                 | 99                | 166            | 20                   | 4.0                  |
| TCIPP (Qual)      | 327                 | 99                | 166            | 25                   | 4.0                  |
| TDBPP (Quan)      | 698.6               | 99                | 166            | 30                   | 7.5                  |
| TDBPP (Qual)      | 692.6               | 99                | 166            | 25                   | 7.5                  |
| TDCIPP (Quan)     | 432.9               | 99                | 166            | 30                   | 6.0                  |
| TDCIPP (Qual)     | 430.9               | 99                | 166            | 30                   | 6.0                  |
| TDCIPP-d15 (Quan) | 448                 | 102               | 166            | 30                   | 6.0                  |
| TDCIPP-d15 (Qual) | 446                 | 102               | 166            | 30                   | 6.0                  |
| TEHP (Quan)       | 435.36              | 99.1              | 166            | 10                   | 14.7                 |
| TEHP (Qual)       | 435.36              | 71                | 166            | 20                   | 14.7                 |
| TEP (Quan)        | 183.08              | 99                | 166            | 29                   | 3.0                  |
| TEP (Qual)        | 183.08              | 81                | 166            | 49                   | 3.0                  |
| TiBP (Quan)       | 267.2               | 99                | 166            | 15                   | 7.4                  |
| TiBP (Qual)       | 267.2               | 81                | 166            | 30                   | 7.4                  |
| m/pTMPP (Quan)    | 369.1               | 166               | 166            | 30                   | 9.2                  |
| m/pTMPP (Qual)    | 369.1               | 91.2              | 166            | 40                   | 9.2                  |
| oTMPP (Quan)      | 369.1               | 166               | 166            | 30                   | 9.1                  |
| oTMPP (Qual)      | 369.1               | 91.2              | 166            | 40                   | 9.1                  |
| TNBP (Quan)       | 267.17              | 99                | 166            | 13                   | 7.1                  |
| TNBP (Qual)       | 267.17              | 81                | 166            | 49                   | 7.1                  |
| TNBP-d27 (Quan)   | 294.34              | 166.1             | 166            | 13                   | 7.1                  |
| TNBP-d27 (Qual)   | 294.34              | 102               | 166            | 13                   | 7.1                  |
| TnPP (Quan)       | 225.13              | 141               | 166            | 9                    | 4.0                  |
| TnPP (Qual)       | 225.13              | 99                | 166            | 29                   | 4.0                  |
| TnPP-d21 (Quan)   | 246.26              | 150.1             | 166            | 13                   | 4.0                  |
| TnPP-d21 (Qual)   | 246.26              | 102               | 166            | 21                   | 4.0                  |
| TPHP (Quan)       | 327.08              | 152.1             | 166            | 45                   | 6.0                  |
| TPHP (Qual)       | 327.08              | 77.1              | 166            | 41                   | 6.0                  |
| TPHP-C13 (Quan)   | 345.08              | 164.1             | 166            | 33                   | 6.0                  |
| TPHP-C13 (Qual)   | 345.08              | 83.1              | 166            | 41                   | 6.0                  |

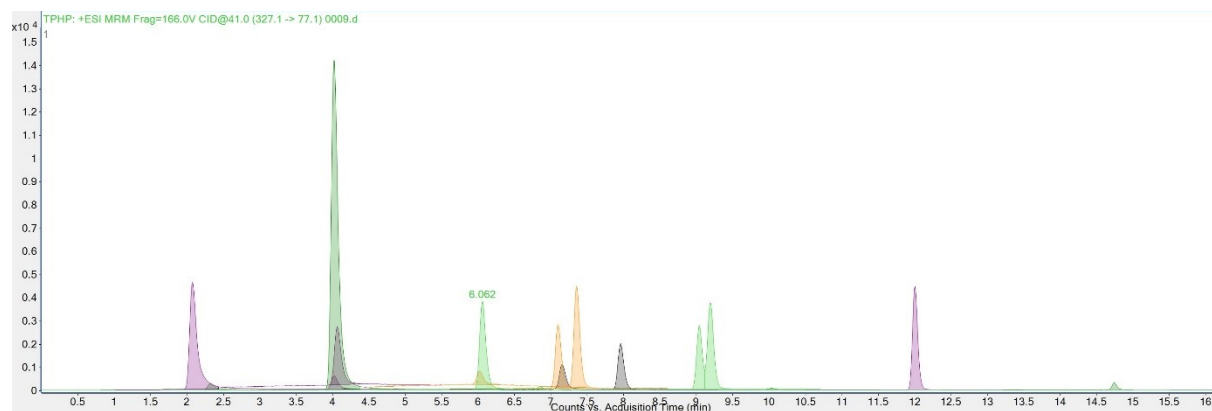

Figure S3. Chromatographic separation of OPE - analytical standards mixture at 10ppb, column Waters Acquity UPLC BEH C18 100x2,1mm

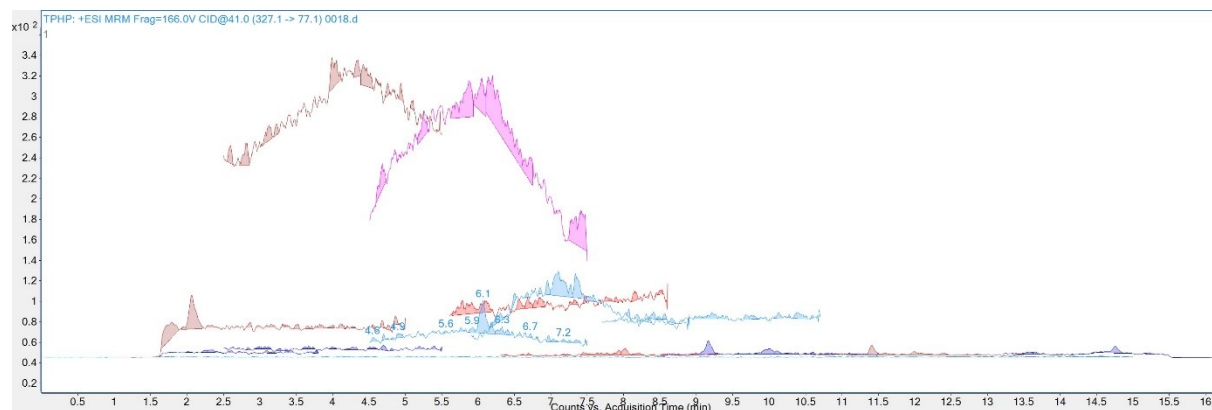

Figure S4. Chromatographic separation of OPE - blank sample, column Waters Acquity UPLC BEH C18 100x2,1mm

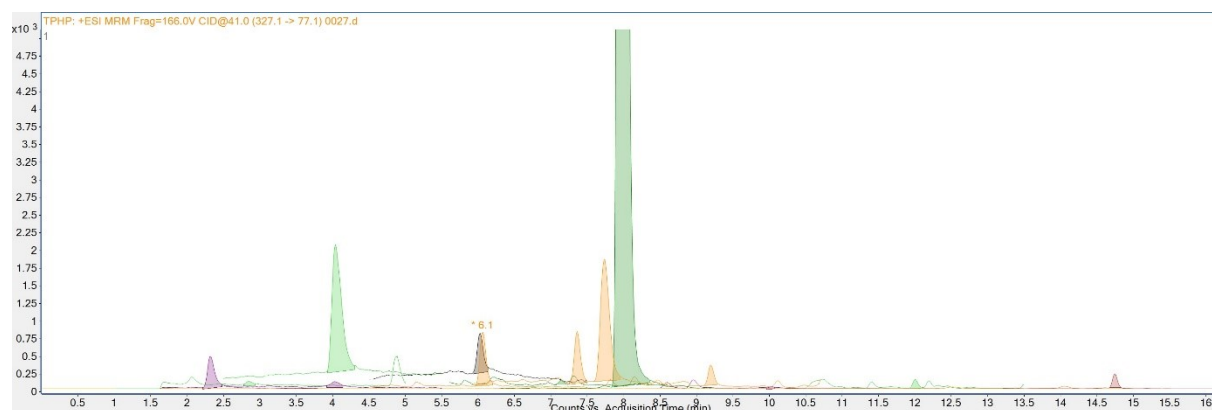

Figure S5. Chromatographic separation of OPE - dust sample (NIST® SRM® 2585), TBOEP (tR=7.9 min) intensity 8x10<sup>4</sup> counts, column Waters Acquity UPLC BEH C18 100x2,1mm

### **S3.2 PBDEs**

PBDEs were analyzed using an Agilent 7890A gas chromatograph (Agilent Technologies, Santa Clara, CA, USA) equipped with an RTX-1614 capillary column (15 m × 0.25 mm i.d., 0.10 µm film thickness; Restek, France), coupled to a Waters AutoSpec Premier high-resolution mass spectrometer (Waters Corporation, Milford, MA, USA). The GC oven temperature program was as follows: an initial hold at 80 °C for 1 minute; ramp at 20 °C/min to 250 °C (no hold); then 1.5 °C/min to 260 °C (2 minute hold); and finally 25 °C/min to 320 °C with a 4.5 minute hold. The GC–MS interface and ion source were maintained at 280 °C and 250 °C, respectively. A 2 µL injection was performed in pulsed splitless mode at 280 °C. Helium was used as the carrier gas at 1.0 mL/min, increased to 1.4 mL/min after 15 minutes. Mass spectrometric detection was conducted in electron impact (EI+) mode using selected ion monitoring (SIM) at a resolving power of >10,000. For BDE-209, a reduced resolution of >5,000 was applied to improve sensitivity.

Table S7. Mass spectrometric parameters for PBDE analyses (GC/MS).

| Abbreviation | Quantifier Ion [m/z] | Qualifier Ion [m/z] | Retention time [min] |
|--------------|----------------------|---------------------|----------------------|
| PBDE28       | 405.8027             | 407.8007            | 7.97                 |
| PBDE47       | 485.7112             | 483.7132            | 9.00                 |
| PBDE66       | 485.7112             | 483.7132            | 9.15                 |
| PBDE85       | 563.6216             | 565.6197            | 10.55                |
| PBDE99       | 563.6216             | 565.6197            | 10.02                |
| PBDE100      | 563.6216             | 565.6197            | 9.77                 |
| PBDE153      | 643.5302             | 641.5322            | 11.40                |
| PBDE154      | 643.5302             | 641.5322            | 10.87                |
| PBDE183      | 721.4407             | 723.4387            | 13.55                |
| PBDE209      | 799.3335             | 797.3355            | 22.18                |
| 13C-PBDE28   | 417.8429             | 419.8409            | 7.97                 |
| 13C-PBDE47   | 497.7513             | 495.7533            | 9.00                 |
| 13C-PBDE99   | 575.6618             | 577.6598            | 10.02                |
| 13C-PBDE100  | 575.6618             | 577.6598            | 9.77                 |
| 13C-PBDE153  | 655.5703             | 653.5723            | 11.40                |
| 13C-PBDE154  | 655.5703             | 653.5723            | 10.87                |
| 13C-PBDE183  | 733.4808             | 735.4788            | 13.55                |
| 13C-PBDE209  | 811.3737             | 809.3757            | 22.18                |
| 13C-PBDE77   | 497.7513             | 495.7533            | 9.37                 |
| 13C-PBDE138  | 655.5703             | 653.5723            | 12.26                |



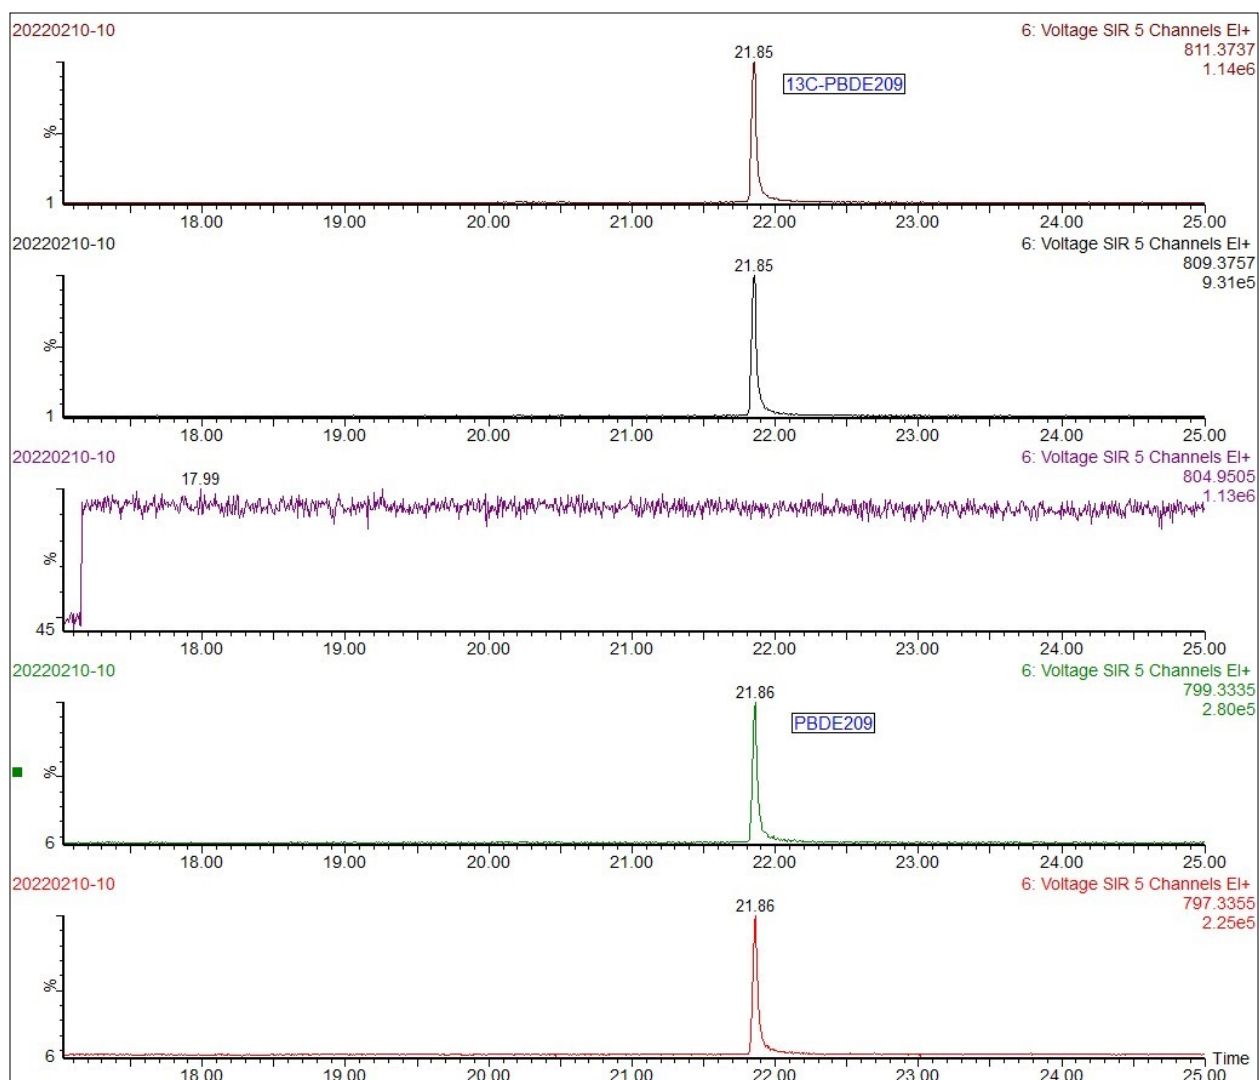

Figure S6. Example chromatograph of BDE-209 standard

### S3.3 AHFRs

AHFRs were analyzed using an Agilent 7890A gas chromatograph (Agilent Technologies, Santa Clara, CA, USA) equipped with an RTX-1614 capillary column (15 m × 0.25 mm i.d., 0.10 µm film thickness; Restek, France), coupled to a Waters AutoSpec Premier high-resolution mass spectrometer (Waters Corporation, Milford, MA, USA). The GC oven temperature program was as follows: initial hold at 80 °C for 1 minute; ramp at 30 °C/min to 140 °C; then 4 °C/min to 175 °C;

8 °C/min to 270 °C; and finally 15 °C/min to 325 °C with a 5-minute hold. A 2 µL injection was performed in pulsed splitless mode at 250 °C. Helium was used as the carrier gas at 1.0 mL/min, increased to 1.4 mL/min after 15 minutes. Mass spectrometric detection was conducted in electron impact (EI+) mode using selected ion monitoring (SIM) at a resolution of >10,000.

Table S8. Mass spectrometric parameters for AHFR analyses (GC/MS)

| Abbreviation | Quantifier Ion [m/z] | Qualifier Ion [m/z] | Retention time [min] |
|--------------|----------------------|---------------------|----------------------|
| ATE          | 369.8027             | 371.8027            | 5.66                 |
| pTBX         | 340.7999             | 342.7979            | 9.43                 |
| BATE         | 329.7714             | 331.7693            | 9.57                 |
| PBBZ         | 471.5954             | 473.5934            | 9.86                 |
| TBCT         | 441.6614             | 443.6593            | 10.75                |
| PBT          | 485.6111             | 487.6090            | 12.72                |
| PBEB         | 499.6266             | 501.6247            | 13.49                |
| DPTE         | 531.6353             | 529.6372            | 15.10                |
| HBB          | 551.5038             | 549.5059            | 15.21                |
| PBBA         | 476.6983             | 474.7003            | 17.68                |
| EH-TBB       | 420.6720             | 418.6740            | 18.75                |
| BTBPE        | 358.7928             | 356.7984            | 23.34                |
| BEH-TEBP     | 464.6618             | 462.6638            | 24.33                |
| sDP          | 271.8102             | 273.8072            | 24.33                |
| aDP          | 271.8102             | 273.8072            | 24.74                |
| DPMA         | 344.9353             | 379.9041            | 11.91                |
| aDBE-DBCH    | 266.9207             | 268.9187            | 8.61                 |
| bDBE-DBCH    | 266.9207             | 268.9187            | 8.81                 |
| gdDBE-DBCH   | 266.9207             | 268.9187            | 10.14                |
| aTBCO        | 266.9207             | 268.9187            | 10.78                |
| bTBCO        | 266.9207             | 268.9187            | 9.76                 |
| DBHCTD       | 267.9285             | 269.9265            | 18.59                |
| T23BPIC      | 487.8643             | 447.8330            | 23.99                |
| DBDPE        | 486.6012             | 484.6032            | 29.25                |
| 13C-PBBZ     | 477.6155             | 479.6135            | 9.86                 |
| 13C-HBB      | 559.5219             | 561.5199            | 15.21                |
| 13C-EH-TBB   | 444.7011             | 446.6991            | 18.62                |
| 13C-BEH-TEBP | 471.6882             | 469.6903            | 24.16                |
| 13C-BTBPE    | 362.8149             | 364.8129            | 23.34                |
| 13C-DBDPE    | 491.6267             | 493.6246            | 29.25                |
| 13C-sDP      | 276.8269             | 278.8240            | 24.33                |
| 13C-aDP      | 276.8269             | 278.8240            | 24.74                |

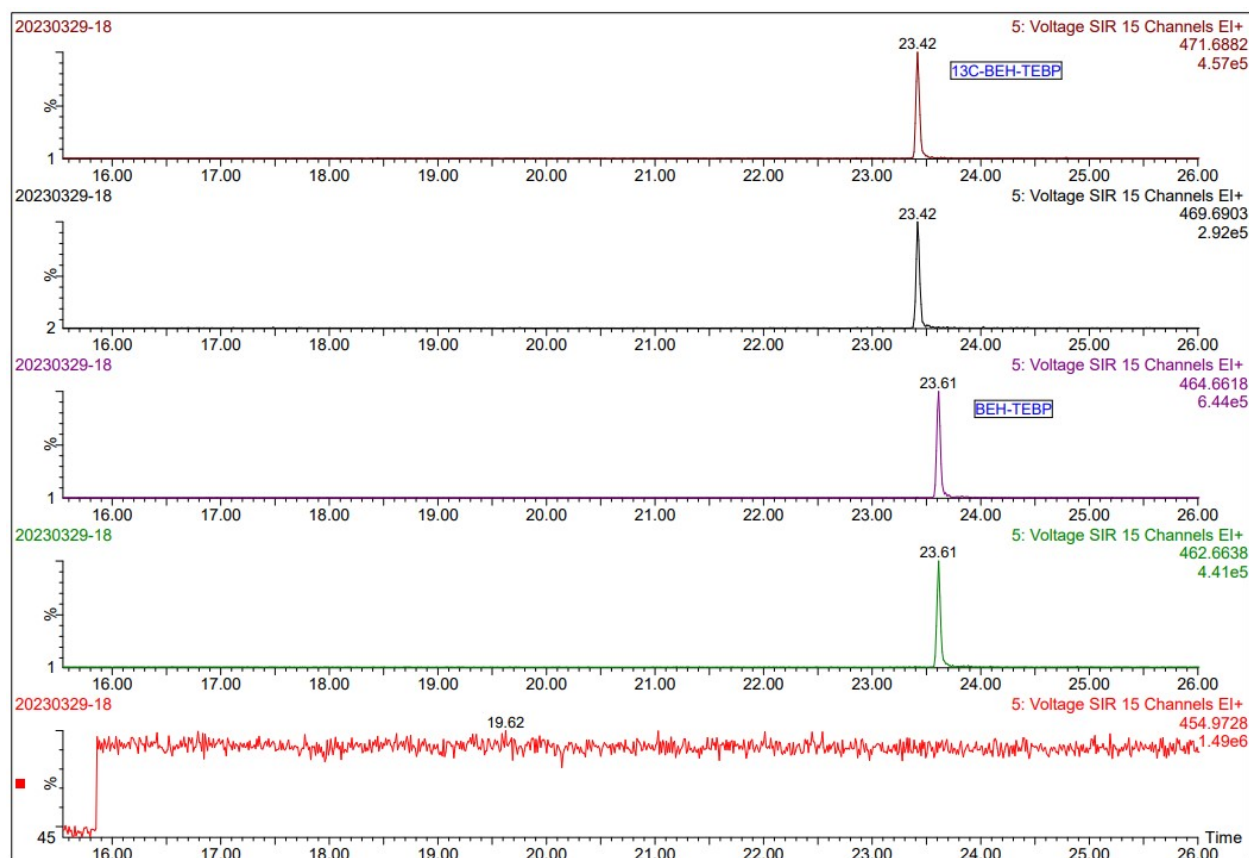

Figure S7. Example chromatograph of BEH-TEBP analytes

#### Text S4: Quality assurance/ Quality control

Recovery efficiencies for samples were tracked by spiking dust samples with labeled analytes prior to extraction. All compounds are adjusted for recoveries through the use of internal (recovery) standards.

Field blanks were collected aboard each research vessel to assess background contamination. These consisted of clean sampling filters briefly exposed to ambient air (30 seconds) and then sealed. A total of seven field blanks were collected: Four from Ship 1, and three from Ships 2 and 3 (although one from Ship 3 was excluded due to contamination from an improperly sealed shaker container during liquid nitrogen processing).

Method detection limits (MDLs) were calculated as the average field blank concentration plus three times the standard deviation of the blank values. For analytes not detected in any blank samples, the instrument detection limit (IDL) was used as the MDL. Sample concentrations above MDL were corrected by subtracting the average blank concentration of the corresponding matrix; values below MDL were reported as such.

All instrumental methods rely on mass-labelled or structurally similar non-environmental congeners to compensate for potential losses during extraction and handling. This is necessary as absolute recoveries can be highly variable due to the heterogeneous composition and heavy matrix effect of dust.

*Table S9. Recovery rates (%) of deuterated OPE internal standards*

|            | Min  | Max  | Median |
|------------|------|------|--------|
| TNBP-d27   | 10.3 | 63.5 | 45.8   |
| TnPP-d21   | 14.4 | 41.2 | 29.7   |
| TDCIPP-d15 | 17.7 | 86.3 | 61.1   |
| TPHP-C13   | 4.4  | 98.7 | 61.9   |

*Table S10. Recovery rates (%) of isotopically labeled PBDE internal standards*

|             | Min  | Max  | Median |
|-------------|------|------|--------|
| 13C-BDE 28  | 20.2 | 90.0 | 50.2   |
| 13C-BDE 47  | 22.4 | 69.8 | 53.3   |
| 13C-BDE 100 | 17.8 | 73.5 | 41.7   |
| 13C-BDE 99  | 16.8 | 73.3 | 42.7   |
| 13C-BDE 154 | 16.3 | 63   | 43.1   |
| 13C-BDE 153 | 18.6 | 65.8 | 49.3   |
| 13C-BDE 183 | 26.4 | 81.9 | 58.6   |
| 13C-BDE 209 | 5.1  | 464  | 32.7   |

*Table S11. Recovery rates (%) of isotopically labeled AHFR standards*

|               | Min  | Max   | Median |
|---------------|------|-------|--------|
| 13C BTBPE     | 26.9 | 184.3 | 57.5   |
| 13C sDP       | 11.5 | 87.6  | 31.9   |
| 13C aDP       | 7.5  | 75.   | 25.1   |
| 13C PBBZ      | 13.1 | 40.4  | 27.1   |
| 13C HBB       | 20.3 | 59    | 36.7   |
| 13C EHTBB     | 30.1 | 124   | 75.2   |
| 13C<br>BEHTBP | 84.9 | 293   | 153    |

## Results

**Table S12: Full list of measured concentrations .....See excel file**

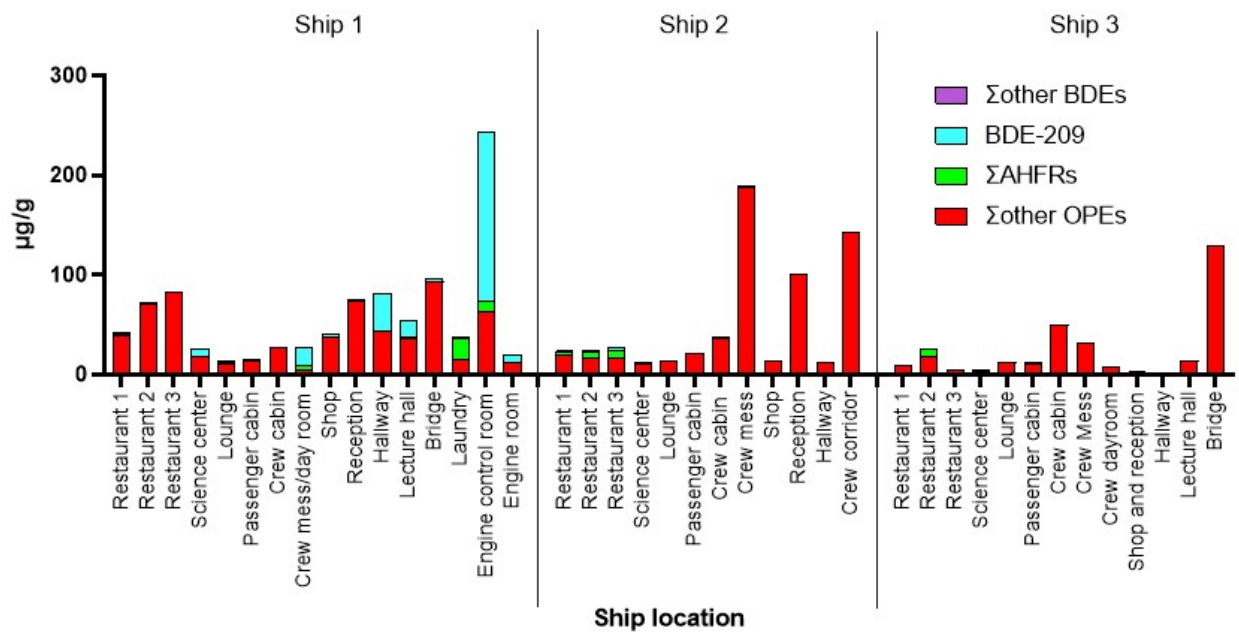

Figure S8. Flame retardant concentrations in different locations across the three sampled ships; excluding TCIPP.

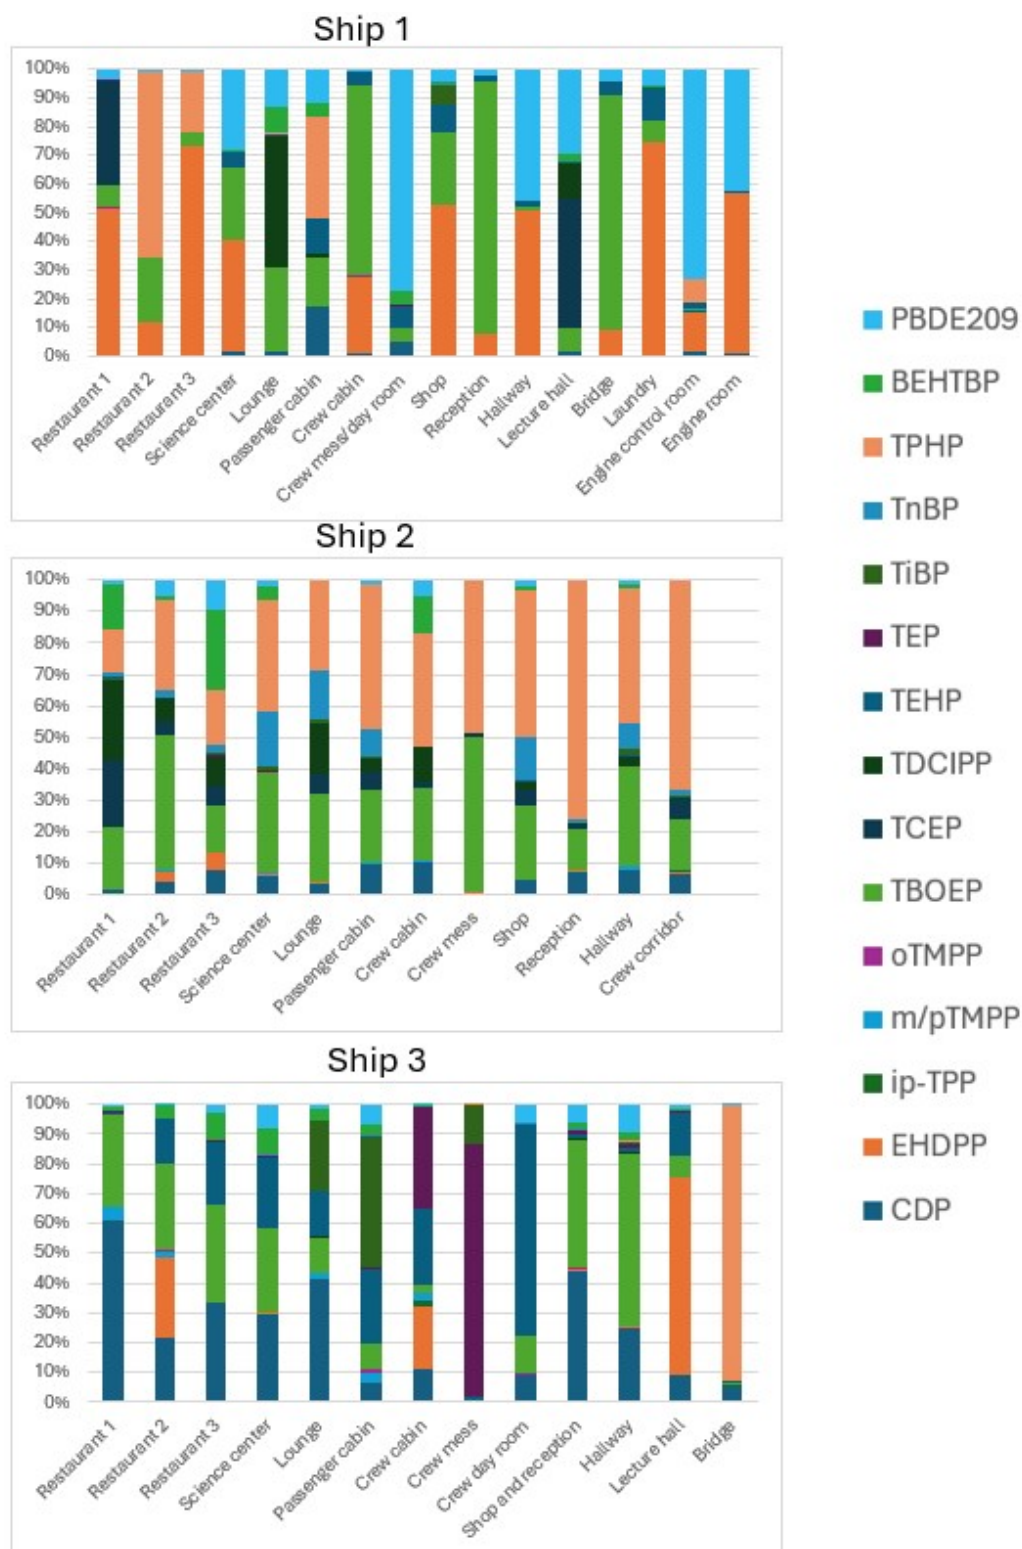

Figure S9. Relative compositions of major flame retardants in different areas of three expedition ships excluding TCIPP.



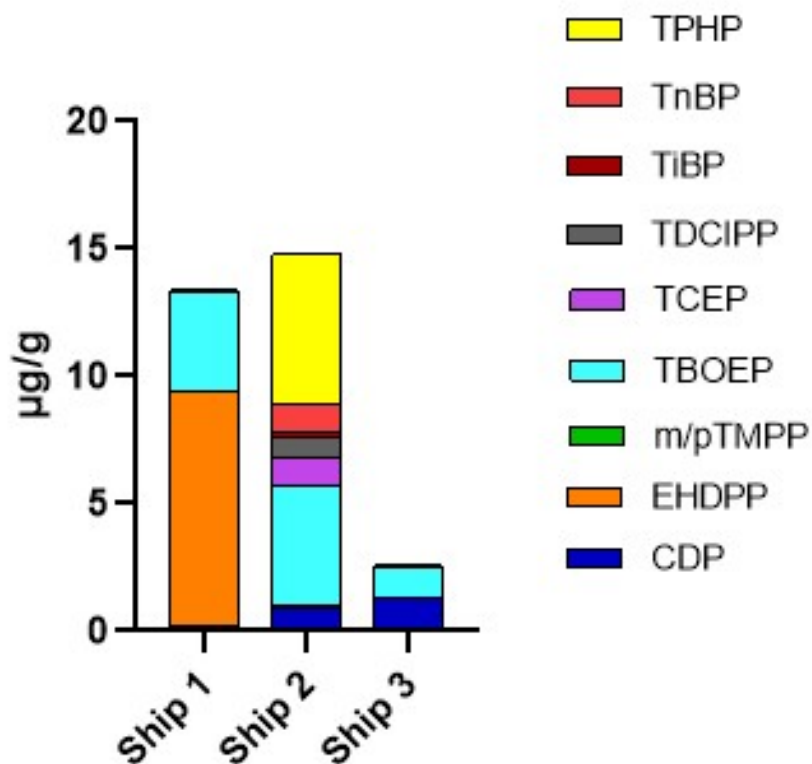

Figure S10. Median OPE concentrations across different ships, excluding TCIPP.

Table S13: Estimated FR exposures via dust

See excel file

## References

- 1 P. Marcinekova, L. Melymuk, P. Bohlin-Nizzetto, E. Martinelli, S. R. Jílková, J. Martiník, P. Šenk, P. Kukučka, O. Audy, J. Kohoutek, M. Ghebremeskel, A. Håland, A. R. Borgen, H. Eikenes, L. Hanssen, M. Harju, Z. Cebula and P. Rostkowski, Development of a supramolecular solvent-based extraction method for application to quantitative analyses of a wide range of organic contaminants in indoor dust, *Anal Bioanal Chem*, 2024, **416**, 4973–4985.
- 2 P. Svobodová, S. R. Jílková, J. Kohoutek, O. Audy, P. Šenk and L. Melymuk, High levels of flame retardants in vehicle dust indicate ongoing use of brominated and organophosphate flame retardants in vehicle interiors, *Environ Monit Assess*, 2025, **197**, 1–17.
