# Supplementary material for: Flame retardants in dust from the indoor environments of expedition cruise ships
Source: Royal Society of Chemistry journal article supplement (doi:10.1039/d5va00257e), 2025-12-04
Supplement: d5va00257e2.xlsx [file d5va00257e2.xlsx]

## Sheet: Ship 1
µg/g
OPEs
	CDP	EHDPP	ip-TPP	m/pTMPP	oTMPP	TBOEP	TCEP	TCIPP	TDBPP	TDCIPP	TEHP	TEP	TiBP	TnBP	TnPP	TPHP
Restaurant 1	0.202	21.1198	<MDL	<MDL	0.416744	2.90305	15.1861	1302.39	<MDL	<MDL	<MDL	<MDL	<MDL	<MDL	<MDL	<MDL
Restaurant 2	0.192	8.44976	<MDL	<MDL	<MDL	15.943	<MDL	66.3589	<MDL	<MDL	<MDL	<MDL	<MDL	<MDL	<MDL	46.397
Restaurant 3	0.282	60.5998	<MDL	<MDL	<MDL	3.99305	<MDL	1130.03	<MDL	<MDL	<MDL	<MDL	<MDL	<MDL	<MDL	17.817
Science center	0.532	9.92976	<MDL	<MDL	<MDL	6.51305	<MDL	1785.7	<MDL	<MDL	1.368	<MDL	<MDL	<MDL	<MDL	<MDL
Lounge	0.222	<MDL	<MDL	<MDL	<MDL	3.77305	<MDL	1182.65	<MDL	6.02942	<MDL	<MDL	<MDL	<MDL	<MDL	<MDL
Passenger cabin	2.682	<MDL	<MDL	<MDL	<MDL	2.64305	<MDL	866.069	<MDL	0.199415	1.918	<MDL	<MDL	<MDL	<MDL	5.51699
Crew cabin	0.272	7.25976	<MDL	<MDL	0.276744	17.883	<MDL	<MDL	<MDL	<MDL	1.298	<MDL	<MDL	<MDL	<MDL	<MDL
Crew mess/day room	1.232	<MDL	<MDL	<MDL	0.106744	1.07305	<MDL	58.4889	<MDL	<MDL	1.968	<MDL	<MDL	<MDL	<MDL	<MDL
Shop	0.252	20.9998	<MDL	<MDL	<MDL	10.043	<MDL	394.359	<MDL	<MDL	3.758	<MDL	2.97136	<MDL	<MDL	<MDL
Reception	<MDL	6.09976	<MDL	<MDL	<MDL	65.533	<MDL	43.3089	<MDL	<MDL	1.298	<MDL	<MDL	<MDL	<MDL	<MDL
Hallway	<MDL	41.3998	<MDL	<MDL	<MDL	1.06305	<MDL	<MDL	<MDL	<MDL	1.548	<MDL	<MDL	<MDL	<MDL	<MDL
Lecture hall	0.752	<MDL	<MDL	<MDL	<MDL	4.57305	23.6461	673.519	<MDL	6.55942	<MDL	<MDL	<MDL	<MDL	<MDL	<MDL
Bridge	0.392	8.33976	<MDL	<MDL	0.306744	79.083	<MDL	37.0189	<MDL	<MDL	4.748	<MDL	<MDL	<MDL	<MDL	<MDL
Laundry	<MDL	11.8798	<MDL	<MDL	<MDL	1.21305	<MDL	<MDL	<MDL	<MDL	1.808	<MDL	<MDL	<MDL	<MDL	<MDL
Engine control room	3.662	32.7398	0.998742	0.825009	<MDL	1.05305	<MDL	77.9489	<MDL	<MDL	4.808	<MDL	<MDL	<MDL	<MDL	18.577
Engine room	0.182	11.2398	<MDL	<MDL	<MDL	<MDL	<MDL	<MDL	<MDL	<MDL	<MDL	<MDL	<MDL	<MDL	<MDL	<MDL
ng/g
PBDEs												AHFRs
	PBDE28	PBDE47	PBDE66	PBDE85	PBDE99	PBDE100	PBDE153	PBDE154	PBDE183	PBDE209			PBBZ	TBCT	PBT	PBEB	TBP-DBPE	HBB	PBBA	EH-TBB	TDBP-TAZTO	BEH-TEBP	DBDPE	TBP-AE	aDBE-DBCH	bDBE-DBCH	gdDBE-DBCH	TBX	BATE	aTBCO	bTBCO	DBHCTD	BTBPE	sDP	aDP
Restaurant 1	<MDL	2.00207	<MDL	<MDL	3.2571	0.53165	0.80083	0.29134	1.51484	1460		Restaurant 1	0.38763	<MDL	0.45229	<MDL	<MDL	<MDL	<MDL	5.00513	<MDL	113.785	66.6691	<MDL	0.177893	0.108227	<MDL	<MDL	<MDL	<MDL	<MDL	<MDL	5.02945	1.6428	3.51639
Restaurant 2	<MDL	0.62536	<MDL	<MDL	0.95852	0.14415	0.55644	<MDL	1.82292	462.774		Restaurant 2	<MDL	<MDL	<MDL	<MDL	<MDL	<MDL	<MDL	1.81777	<MDL	54.0878	84.1645	<MDL	<MDL	<MDL	<MDL	<MDL	<MDL	<MDL	<MDL	<MDL	6.92183	2.18014	4.58041
Restaurant 3	<MDL	2.31038	<MDL	<MDL	1.97167	0.30502	<MDL	<MDL	1.16059	519.37		Restaurant 3	<MDL	<MDL	0.85361	<MDL	<MDL	1.10327	<MDL	4.28747	<MDL	46.1465	32.3163	<MDL	<MDL	<MDL	<MDL	<MDL	<MDL	<MDL	<MDL	<MDL	5.25091	1.46531	2.97193
Science center	<MDL	4.45044	<MDL	<MDL	7.31828	1.01594	1.76835	0.848	5.53495	7210		Science center	2.13598	<MDL	0.55467	0.50638	<MDL	6.41091	<MDL	8.80414	<MDL	222.945	267.171	<MDL	<MDL	<MDL	<MDL	<MDL	<MDL	<MDL	<MDL	<MDL	7.28506	2.26672	5.77677
Lounge	<MDL	3.4909	<MDL	<MDL	5.69997	1.24945	1.05521	<MDL	3.76214	1700		Lounge	0.76565	<MDL	0.71068	<MDL	<MDL	1.414	<MDL	26.7503	<MDL	1213.85	160.612	<MDL	<MDL	<MDL	<MDL	<MDL	<MDL	<MDL	<MDL	<MDL	6.56317	1.8172	3.72624
Passenger cabin	<MDL	4.67821	<MDL	0.415829	9.01628	1.39967	1.15848	0.661183	2.40889	1850		Passenger cabin	<MDL	<MDL	0.565341	0.401659	<MDL	<MDL	<MDL	21.6572	<MDL	727.304	56.1924	<MDL	<MDL	<MDL	<MDL	<MDL	<MDL	<MDL	<MDL	<MDL	9.042	2.11532	2.80941
Crew cabin	<MDL	4.52064	<MDL	<MDL	4.46327	0.77797	0.51392	0.30877	0.43265	220.961		Crew cabin	<MDL	<MDL	3.52202	<MDL	<MDL	0.55168	<MDL	3.16885	<MDL	33.5894	65.8375	<MDL	<MDL	<MDL	<MDL	<MDL	<MDL	<MDL	<MDL	<MDL	13.3413	4.53471	10.0286
Crew mess/day room	<MDL	1.77806	<MDL	<MDL	1.88468	0.278432	1.46435	0.493568	6.91458	19200		Crew mess/day room	2.79231	<MDL	1.42013	4.35074	<MDL	6.34521	<MDL	32.9475	<MDL	1276.01	2817.58	<MDL	<MDL	<MDL	<MDL	<MDL	<MDL	<MDL	<MDL	<MDL	2.76959	1.04754	1.99969
Shop	<MDL	2.98221	<MDL	<MDL	4.14434	0.63982	1.18821	0.55874	3.74081	1850		Shop	0.78184	<MDL	0.79687	<MDL	<MDL	1.16776	<MDL	11.7522	<MDL	261.184	71.8704	<MDL	<MDL	<MDL	<MDL	<MDL	<MDL	<MDL	<MDL	<MDL	6.67848	2.07148	4.22021
Reception	<MDL	3.7973	<MDL	<MDL	5.45022	0.92854	6.52253	1.56216	26.7263	1570		Reception	0.82018	<MDL	0.84138	<MDL	<MDL	1.90035	<MDL	10.1336	<MDL	277.263	78.4805	<MDL	<MDL	<MDL	<MDL	<MDL	<MDL	<MDL	<MDL	<MDL	2.46632	0.98932	2.16148
Hallway	<MDL	0.4494	<MDL	<MDL	0.77272	<MDL	<MDL	0.58683	5.98488	36800		Hallway	3.78011	<MDL	0.64413	<MDL	<MDL	3.30968	<MDL	1.41124	<MDL	53.8382	28.4191	<MDL	<MDL	<MDL	<MDL	<MDL	<MDL	<MDL	<MDL	<MDL	8.32611	2.0295	4.6705
Lecture hall	0.30741	21.3449	0.48457	1.5907	33.2271	5.06399	6.18281	2.71872	5.78687	15600		Lecture hall	2.25314	<MDL	1.55954	0.88542	<MDL	2.8078	<MDL	46.0117	<MDL	1543.86	782.308	<MDL	1.23975	0.904267	0.584067	<MDL	<MDL	<MDL	<MDL	<MDL	8.20082	2.05201	3.15343
Bridge	<MDL	1.06972	<MDL	<MDL	0.930717	<MDL	<MDL	<MDL	<MDL	3920		Bridge	1.35646	<MDL	<MDL	<MDL	<MDL	2.98346	<MDL	<MDL	<MDL	53.679	<MDL	<MDL	<MDL	<MDL	<MDL	<MDL	<MDL	<MDL	<MDL	<MDL	7.48828	3.39376	7.18217
Laundry	<MDL	1.34047	<MDL	<MDL	1.736	<MDL	<MDL	<MDL	1.77043	938.951		Laundry	3.07791	<MDL	19.1924	7.86221	<MDL	14.5549	<MDL	5.5621	<MDL	58.4702	21147.6	<MDL	0.352207	<MDL	<MDL	<MDL	<MDL	<MDL	<MDL	<MDL	8.70693	2.7454	6.42791
Engine control room	<MDL	2.28313	<MDL	<MDL	5.25771	0.907178	129.469	11.0684	256.568	169000		Engine control room	40.2733	<MDL	17.6002	4.51127	<MDL	45.5502	<MDL	<MDL	<MDL	109.263	10292.6	<MDL	<MDL	<MDL	<MDL	<MDL	<MDL	<MDL	<MDL	<MDL	9.80913	4.5784	9.59547
Engine room	<MDL	0.23507	<MDL	<MDL	0.43797	<MDL	2.82531	1.08497	3.87356	8510		Engine room	1.04552	<MDL	<MDL	<MDL	<MDL	0.89989	<MDL	<MDL	<MDL	<MDL	77.2246	<MDL	<MDL	<MDL	<MDL	<MDL	<MDL	<MDL	<MDL	<MDL	5.6566	1.62035	3.49345

## Sheet: Ship 2
µg/g
OPEs
	CDP	EHDPP	ip-TPP	m/pTMPP	oTMPP	TBOEP	TCEP	TCIPP	TDBPP	TDCIPP	TEHP	TEP	TiBP	TnBP	TnPP	TPhP
Restaurant 1	0.389343	<MDL	<MDL	0.052	<MDL	4.57435	4.93394	1688.71	<MDL	6.102	<MDL	<MDL	0.116661	0.317833	<MDL	3.26975
Restaurant 2	0.730343	0.555061	0.034	0.076	<MDL	7.83435	0.83094	1508.71	<MDL	1.262	<MDL	<MDL	<MDL	0.408833	<MDL	5.20975
Restaurant 3	2.15234	1.39506	0.022	0.114	<MDL	3.93435	1.66394	937.708	<MDL	2.442	<MDL	<MDL	0.234661	0.718833	<MDL	4.63975
Science center	0.729343	<MDL	0.023	0.101	<MDL	3.59435	<MDL	206.708	<MDL	<MDL	<MDL	<MDL	0.138661	1.99183	<MDL	4.06975
Lounge	0.537343	<MDL	<MDL	0.062	<MDL	3.88435	0.79594	359.708	<MDL	2.232	<MDL	<MDL	0.181661	2.11183	<MDL	3.98975
Passenger cabin	2.13234	<MDL	<MDL	0.105	<MDL	4.85435	1.25394	14.9078	<MDL	0.842	<MDL	<MDL	0.149661	1.75183	<MDL	9.82975
Crew cabin	4.45234	<MDL	0.039	0.156	<MDL	9.91435	0.90394	65.5078	<MDL	4.642	<MDL	<MDL	<MDL	<MDL	<MDL	15.3998
Crew mess	0.878343	1.00506	0.356	0.044	<MDL	91.7743	2.44394	102.708	<MDL	0.319	<MDL	<MDL	0.146661	0.311833	<MDL	91.0998
Shop	0.669343	<MDL	0.011	0.018	<MDL	3.33435	0.62594	534.708	<MDL	0.416	<MDL	<MDL	<MDL	1.89183	<MDL	6.56975
Reception	7.22234	0.655061	0.04	0.273	<MDL	13.0743	1.29394	656.708	<MDL	0.339	<MDL	<MDL	0.208661	1.37183	<MDL	76.3998
Hallway	0.940343	<MDL	<MDL	0.13	<MDL	3.78435	<MDL	100.708	<MDL	0.37	<MDL	<MDL	0.207661	0.911833	<MDL	5.13975
Crew corridor	9.89043	0.943826	0.125	0.35375	<MDL	23.2179	9.10492	493.385	<MDL	0.75125	<MDL	<MDL	0.254576	2.67729	0.005	95.2497
ng/g
PBDEs												AHFRs
	PBDE28	PBDE47	PBDE66	PBDE85	PBDE99	PBDE100	PBDE153	PBDE154	PBDE183	PBDE209			PBBZ	TBCT	PBT	PBEB	TBP-DBPE	HBB	PBBA	EH-TBB	TDBP-TAZTO	BEH-TEBP	DBDPE	TBP-AE	aDBE-DBCH	bDBE-DBCH	gdDBE-DBCH	TBX	BATE	aTBCO	bTBCO	DBHCTD	BTBPE	sDP	aDP
Restaurant 1	<MDL	8.3641	<MDL	<MDL	5.13	0.86	0.573	<MDL	<MDL	338		Restaurant 1	<MDL	<MDL	<MDL	<MDL	<MDL	<MDL	<MDL	60.4521	<MDL	3318.85	23.8388	<MDL	1.19952	0.84372	0.267667	<MDL	<MDL	<MDL	<MDL	<MDL	*NA	3.43271	6.56006
Restaurant 2	<MDL	21.6803	<MDL	<MDL	12.4333	<MDL	<MDL	<MDL	<MDL	2280		Restaurant 2	1.12807	<MDL	1.9278	<MDL	3.49716	<MDL	<MDL	100.668	<MDL	5156.22	23.0763	<MDL	0.680711	0.567556	<MDL	<MDL	<MDL	<MDL	<MDL	<MDL	*NA	12.3128	232.243
Restaurant 3	<MDL	14.1301	<MDL	<MDL	10.7625	3.1875	<MDL	<MDL	<MDL	2587.5		Restaurant 3	<MDL	<MDL	3.86317	0.73195	2.16878	2.25915	<MDL	128.545	<MDL	6668.25	31.7971	<MDL	5.50765	4.3454	1.37085	<MDL	<MDL	<MDL	<MDL	<MDL	*NA	19.7577	40.0345
Science center	<MDL	17.954	<MDL	<MDL	5.73077	2.12821	<MDL	<MDL	<MDL	230.769		Science center	<MDL	<MDL	15.1345	<MDL	<MDL	0.749026	<MDL	8.3366	<MDL	540.6	22.1766	<MDL	0.327265	0.245179	<MDL	<MDL	<MDL	<MDL	<MDL	<MDL	*NA	5.24169	6.95176
Passenger cabin	<MDL	23.7602	0.7475	<MDL	11.75	5.525	<MDL	<MDL	<MDL	950		Passenger cabin	<MDL	<MDL	<MDL	<MDL	<MDL	<MDL	<MDL	6.16247	<MDL	232.279	<MDL	<MDL	<MDL	<MDL	<MDL	<MDL	<MDL	<MDL	<MDL	<MDL	*NA	4.2615	6.70955
Crew cabin	<MDL	25.4277	<MDL	<MDL	7.04545	2.83182	<MDL	<MDL	<MDL	338.182		Crew cabin	<MDL	<MDL	<MDL	<MDL	<MDL	<MDL	<MDL	<MDL	<MDL	167.432	<MDL	<MDL	<MDL	<MDL	<MDL	<MDL	<MDL	<MDL	<MDL	<MDL	*NA	14.8848	17.8947
Crew mess	<MDL	18.4064	0.584848	1.18788	18.8788	6.06061	<MDL	<MDL	<MDL	282.424		Crew mess	<MDL	<MDL	<MDL	<MDL	<MDL	2.77248	<MDL	<MDL	<MDL	66.7468	<MDL	<MDL	1.12949	1.11685	0.537414	<MDL	<MDL	<MDL	<MDL	<MDL	*NA	17.8575	22.4396
Hallway	<MDL	13.1222	<MDL	<MDL	4.5974	1.02597	<MDL	1.77922	<MDL	148.052		Hallway	<MDL	<MDL	1.29182	<MDL	1.76752	<MDL	<MDL	4.21466	<MDL	160.843	22.6809	0.247948	0.24703	0.136156	<MDL	<MDL	<MDL	<MDL	<MDL	<MDL	*NA	34.4985	443.326

## Sheet: Ship 3
µg/g
OPEs
	CDP	EHDPP	ip-TPP	m/pTMPP	oTMPP	TBOEP	TCEP	TCIPP	TDBPP	TDCIPP	TEHP	TEP	TiBP	TnBP	TnPP	TPHP
Restaurant 1	5.582	<MDL	<MDL	0.435009	<MDL	2.80957	<MDL	45.1189	<MDL	<MDL	<MDL	<MDL	<MDL	<MDL	<MDL	<MDL
Restaurant 2	4.232	5.25976	<MDL	0.445009	0.106744	5.68957	<MDL	556.759	<MDL	<MDL	2.898	<MDL	<MDL	<MDL	<MDL	<MDL
Restaurant 3	1.652	<MDL	<MDL	<MDL	<MDL	1.61957	<MDL	<MDL	<MDL	<MDL	1.018	<MDL	<MDL	<MDL	<MDL	<MDL
Science center	1.342	<MDL	<MDL	<MDL	<MDL	1.25957	<MDL	110.899	<MDL	<MDL	1.058	<MDL	<MDL	<MDL	<MDL	<MDL
Lounge	5.242	<MDL	<MDL	0.265009	<MDL	1.48957	<MDL	327.359	<MDL	<MDL	1.948	<MDL	2.99136	<MDL	<MDL	<MDL
Passenger cabin	0.832	<MDL	<MDL	0.385009	0.216744	1.06957	<MDL	<MDL	<MDL	<MDL	3.168	<MDL	5.64136	<MDL	<MDL	<MDL
Crew cabin	5.622	10.4498	1.20874	1.26501	<MDL	1.05957	<MDL	<MDL	<MDL	<MDL	12.958	17.2316	<MDL	<MDL	<MDL	<MDL
Crew Mess	0.432	<MDL	<MDL	<MDL	<MDL	<MDL	<MDL	<MDL	<MDL	<MDL	<MDL	27.1616	4.20136	<MDL	<MDL	<MDL
Crew dayroom	0.752	<MDL	<MDL	<MDL	<MDL	1.03957	<MDL	64.7389	<MDL	<MDL	5.778	<MDL	<MDL	<MDL	<MDL	<MDL
Shop and reception	1.192	<MDL	<MDL	<MDL	<MDL	1.15957	<MDL	<MDL	<MDL	<MDL	<MDL	<MDL	<MDL	<MDL	<MDL	<MDL
Hallway	0.612	<MDL	<MDL	<MDL	<MDL	1.41957	<MDL	73.2889	<MDL	<MDL	<MDL	<MDL	<MDL	<MDL	<MDL	<MDL
Lecture hall	1.272	9.21976	<MDL	<MDL	<MDL	0.969568	<MDL	57.5289	<MDL	<MDL	2.038	<MDL	<MDL	<MDL	<MDL	<MDL
Bridge	6.542	<MDL	1.42874	<MDL	<MDL	0.679568	<MDL	<MDL	<MDL	<MDL	0.918	<MDL	<MDL	<MDL	<MDL	119.667
ng/g
PBDEs												AHFRs
	PBDE28	PBDE47	PBDE66	PBDE85	PBDE99	PBDE100	PBDE153	PBDE154	PBDE183	PBDE209			PBBZ	TBCT	PBT	PBEB	TBP-DBPE	HBB	PBBA	EH-TBB	TDBP-TAZTO	BEH-TEBP	DBDPE	TBP-AE	aDBE-DBCH	bDBE-DBCH	gdDBE-DBCH	TBX	BATE	aTBCO	bTBCO	DBHCTD	BTBPE	sDP	aDP
Restaurant 1	<MDL	0.92326	<MDL	<MDL	1.30853	0.19968	<MDL	<MDL	<MDL	84.2477		Restaurant 1	<MDL	<MDL	0.89441	<MDL	<MDL	<MDL	<MDL	4.24325	<MDL	117.429	<MDL	<MDL	<MDL	<MDL	<MDL	<MDL	<MDL	<MDL	<MDL	<MDL	3.42288	1.67816	3.36853
Restaurant 2	0.09543	10.6249	0.2313	0.47595	11.2006	2.15166	1.11499	0.83228	<MDL	<MDL		Restaurant 2	15.7382	<MDL	112.076	19.951	<MDL	109.55	<MDL	33.9751	<MDL	871.5	6273.54	<MDL	0.32728	0.200053	<MDL	<MDL	<MDL	<MDL	<MDL	<MDL	4.16329	1.82285	3.19154
Restaurant 3	<MDL	2.09239	<MDL	<MDL	2.53589	0.44074	<MDL	<MDL	<MDL	130.616		Restaurant 3	0.43099	<MDL	1.51521	<MDL	<MDL	<MDL	<MDL	13.5052	<MDL	462.112	42.996	<MDL	0.310387	0.182013	<MDL	<MDL	<MDL	<MDL	<MDL	<MDL	4.16771	2.00879	3.99139
Science center	<MDL	2.22426	<MDL	<MDL	3.2212	0.751229	<MDL	<MDL	<MDL	398.563		Science center	<MDL	<MDL	5.58777	<MDL	<MDL	<MDL	<MDL	20.3276	<MDL	367.157	<MDL	<MDL	<MDL	<MDL	<MDL	<MDL	<MDL	<MDL	<MDL	<MDL	12.4911	6.57617	14.9966
Lounge	<MDL	2.80153	<MDL	<MDL	4.04002	0.830968	0.508695	0.352389	<MDL	216.044		Lounge	<MDL	<MDL	1.23785	<MDL	<MDL	0.651253	<MDL	19.6141	<MDL	439.514	17.0919	<MDL	0.12633	<MDL	<MDL	<MDL	<MDL	<MDL	<MDL	<MDL	4.25238	1.77418	3.83795
Passenger cabin	<MDL	4.88045	<MDL	<MDL	6.88794	1.36829	0.69609	0.55991	<MDL	825.459		Passenger cabin	0.61667	<MDL	0.82166	<MDL	<MDL	1.00861	<MDL	32.6468	<MDL	484.066	21.4477	<MDL	<MDL	<MDL	<MDL	<MDL	<MDL	<MDL	<MDL	<MDL	2.73085	1.23982	2.25971
Crew cabin	<MDL	0.90392	<MDL	<MDL	0.8183	<MDL	<MDL	<MDL	<MDL	244.491		Crew cabin	0.4526	<MDL	1.76528	<MDL	<MDL	<MDL	<MDL	3.99256	<MDL	82.1352	19.0233	<MDL	<MDL	<MDL	<MDL	<MDL	<MDL	<MDL	<MDL	<MDL	3.0404	1.34194	3.35296
Crew dayroom	<MDL	<MDL	<MDL	<MDL	<MDL	<MDL	<MDL	<MDL	<MDL	491.708		Crew dayroom	<MDL	<MDL	2.63143	<MDL	<MDL	0.84843	<MDL	<MDL	<MDL	21.0409	39.7029	<MDL	<MDL	<MDL	<MDL	<MDL	<MDL	<MDL	<MDL	<MDL	4.40564	1.78506	3.86986
Shop and reception	<MDL	0.312544	<MDL	<MDL	0.505824	<MDL	<MDL	<MDL	<MDL	178.267		Shop and reception	<MDL	<MDL	1.35196	<MDL	<MDL	<MDL	<MDL	<MDL	<MDL	45.3735	<MDL	<MDL	<MDL	<MDL	<MDL	<MDL	<MDL	<MDL	<MDL	<MDL	2.86756	1.67916	3.41737
Hallway	<MDL	0.66684	<MDL	<MDL	0.85512	0.16856	<MDL	<MDL	<MDL	244.138		Hallway	0.33137	<MDL	1.14539	<MDL	<MDL	<MDL	<MDL	2.45306	<MDL	61.2972	12.6401	<MDL	<MDL	<MDL	<MDL	<MDL	<MDL	<MDL	<MDL	<MDL	4.2356	1.90046	4.65725
Lecture hall	<MDL	0.701781	<MDL	<MDL	1.24739	0.229797	<MDL	<MDL	<MDL	232.953		Lecture hall	<MDL	<MDL	10.7321	<MDL	<MDL	0.99675	<MDL	3.96628	<MDL	84.7772	41.6338	<MDL	<MDL	<MDL	<MDL	<MDL	<MDL	<MDL	<MDL	<MDL	4.95553	2.58428	5.59148
Bridge	<MDL	0.418971	<MDL	<MDL	0.8086	<MDL	<MDL	<MDL	<MDL	35.661		Bridge	<MDL	<MDL	1.33926	<MDL	<MDL	0.5767	<MDL	<MDL	<MDL	27.3277	20.7792	<MDL	<MDL	<MDL	<MDL	<MDL	<MDL	<MDL	<MDL	<MDL	5.43764	2.51423	5.43713
