# Supplementary material for: Flame retardants in dust from the indoor environments of expedition cruise ships
Source: Royal Society of Chemistry journal article supplement (doi:10.1039/d5va00257e), 2025-12-04
Supplement: d5va00257e3.xlsx [file d5va00257e3.xlsx]

## Sheet: Sheet1
TCIPP
Ship 1					Ship 2					Ship 3
	EDIingestion	EDIdermal	EDItotal			EDIingestion	EDIdermal	EDItotal			EDIingestion	EDIdermal	EDItotal
Restaurant 1	156.923	90.5249	247.448		Restaurant 1	211.626	122.082	333.708		Restaurant 1	5.30764	3.06184	8.36948
Restaurant 2	12.1308	6.99797	19.1288		Restaurant 2	190.541	109.918	300.459		Restaurant 2	65.2426	37.6368	102.879
Restaurant 3	136.732	78.8774	215.61		Restaurant 3	123.652	71.3317	194.984		Restaurant 3	0.037768	0.0217874	0.0595554
Bartender	142.896	82.4333	225.329		Bartender	55.9434	32.2723	88.2157		Bartender (Explorer lounge)	38.37	22.1347	60.5048
Reception	9.43068	5.44032	14.871		Reception	90.7348	52.3426	143.077		Reception	0.037768	0.0217874	0.0595554
Shop	50.5537	29.1632	79.7168		Shop	76.4434	44.0983	120.542		Shop	0.037768	0.0217874	0.0595554
Housekeep	12.8097	7.38957	20.1992		Housekeep	63.773	36.7891	100.562		Housekeep	5.30764	3.06184	8.36948
Officer	8.69385	5.01526	13.7091							Officer	0.037768	0.0217874	0.0595554
Technician (Engine control room)	13.4885	7.78118	21.2697
TBOEP
Ship 1					Ship 2					Ship 3
	EDIingestion	EDIdermal	EDItotal			EDIingestion	EDIdermal	EDItotal			EDIingestion	EDIdermal	EDItotal
Restaurant 1	2.1059	1.21484	3.32074		Restaurant 1	8.28816	4.78123	13.0694		Restaurant 1	0.429348	0.24768	0.677028
Restaurant 2	3.63344	2.09604	5.72948		Restaurant 2	8.67004	5.00153	13.6716		Restaurant 2	0.766719	0.442301	1.20902
Restaurant 3	2.23358	1.2885	3.52208		Restaurant 3	8.21319	4.73798	12.9512		Restaurant 3	0.289948	0.167264	0.457212
Bartender	2.20781	1.27363	3.48145		Bartender	8.20733	4.7346	12.9419		Bartender (Explorer lounge)	0.274719	0.158479	0.433198
Reception	9.44256	5.44717	14.8897		Reception	9.28387	5.35563	14.6395		Reception	0.236062	0.136178	0.372241
Shop	2.9423	1.69734	4.63964		Shop	8.1429	4.69744	12.8403		Shop	0.236062	0.136178	0.372241
Housekeep	2.2207	1.28107	3.50176		Housekeep	8.30456	4.79069	13.0952		Housekeep	0.236062	0.136178	0.372241
Officer	11.0298	6.36284	17.3927							Officer	0.179834	0.103742	0.283575
Technician (Engine control room)	1.88918	1.08982	2.97901
BDE-209
Ship 1					Ship 2					Ship 3
	EDIingestion	EDIdermal	EDItotal			EDIingestion	EDIdermal	EDItotal			EDIingestion	EDIdermal	EDItotal
Restaurant 1	1.61366	0.930877	2.54453		Restaurant 1	0.250912	0.144745	0.395658		Restaurant 1	0.0311307	0.0179585	0.0490892
Restaurant 2	1.49644	0.86326	2.3597		Restaurant 2	0.321116	0.185244	0.50636		Restaurant 2	0.0225784	0.0130249	0.0356034
Restaurant 3	1.50307	0.867085	2.37016		Restaurant 3	0.514177	0.296616	0.810793		Restaurant 3	0.0365623	0.0210919	0.0576543
Bartender	1.64175	0.947084	2.58883		Bartender	0.21231	0.122476	0.334787		Bartender (Explorer lounge)	0.0465175	0.0268348	0.0733523
Reception	1.62632	0.938183	2.5645		Reception	0.21231	0.122476	0.334787		Reception	0.0416776	0.0240427	0.0657203
Shop	1.65904	0.957061	2.6161		Shop	0.247417	0.142729	0.390145		Shop	0.0416776	0.0240427	0.0657203
Housekeep	1.65883	0.956939	2.61577		Housekeep	0.249165	0.143737	0.392902		Housekeep	0.047255	0.0272602	0.0745152
Officer	1.89991	1.09601	2.99592							Officer	0.025014	0.0144299	0.0394439
Technician (Engine control room)	21.2744	12.2727	33.547
